# Supplementary material for: Elucidation of Phytochemicals Affecting Platelet Responsiveness in Dangguisu-san: Active Ingredient Prediction and Experimental Research Using Network Pharmacology
Source: MDPI journal article supplement (doi:10.3390/plants12051120), 2023-03-02
Supplement: s1 [file s1]

Supplementary data

**Elucidation of Phytochemicals Affecting Platelet Responsiveness in Dangguisu-san:  
Active ingredient prediction and experimental research using network  
pharmacology**

Figure S1. HPLC-Q-TOF-MS chromatogram of Dangguisu-san in negative mode

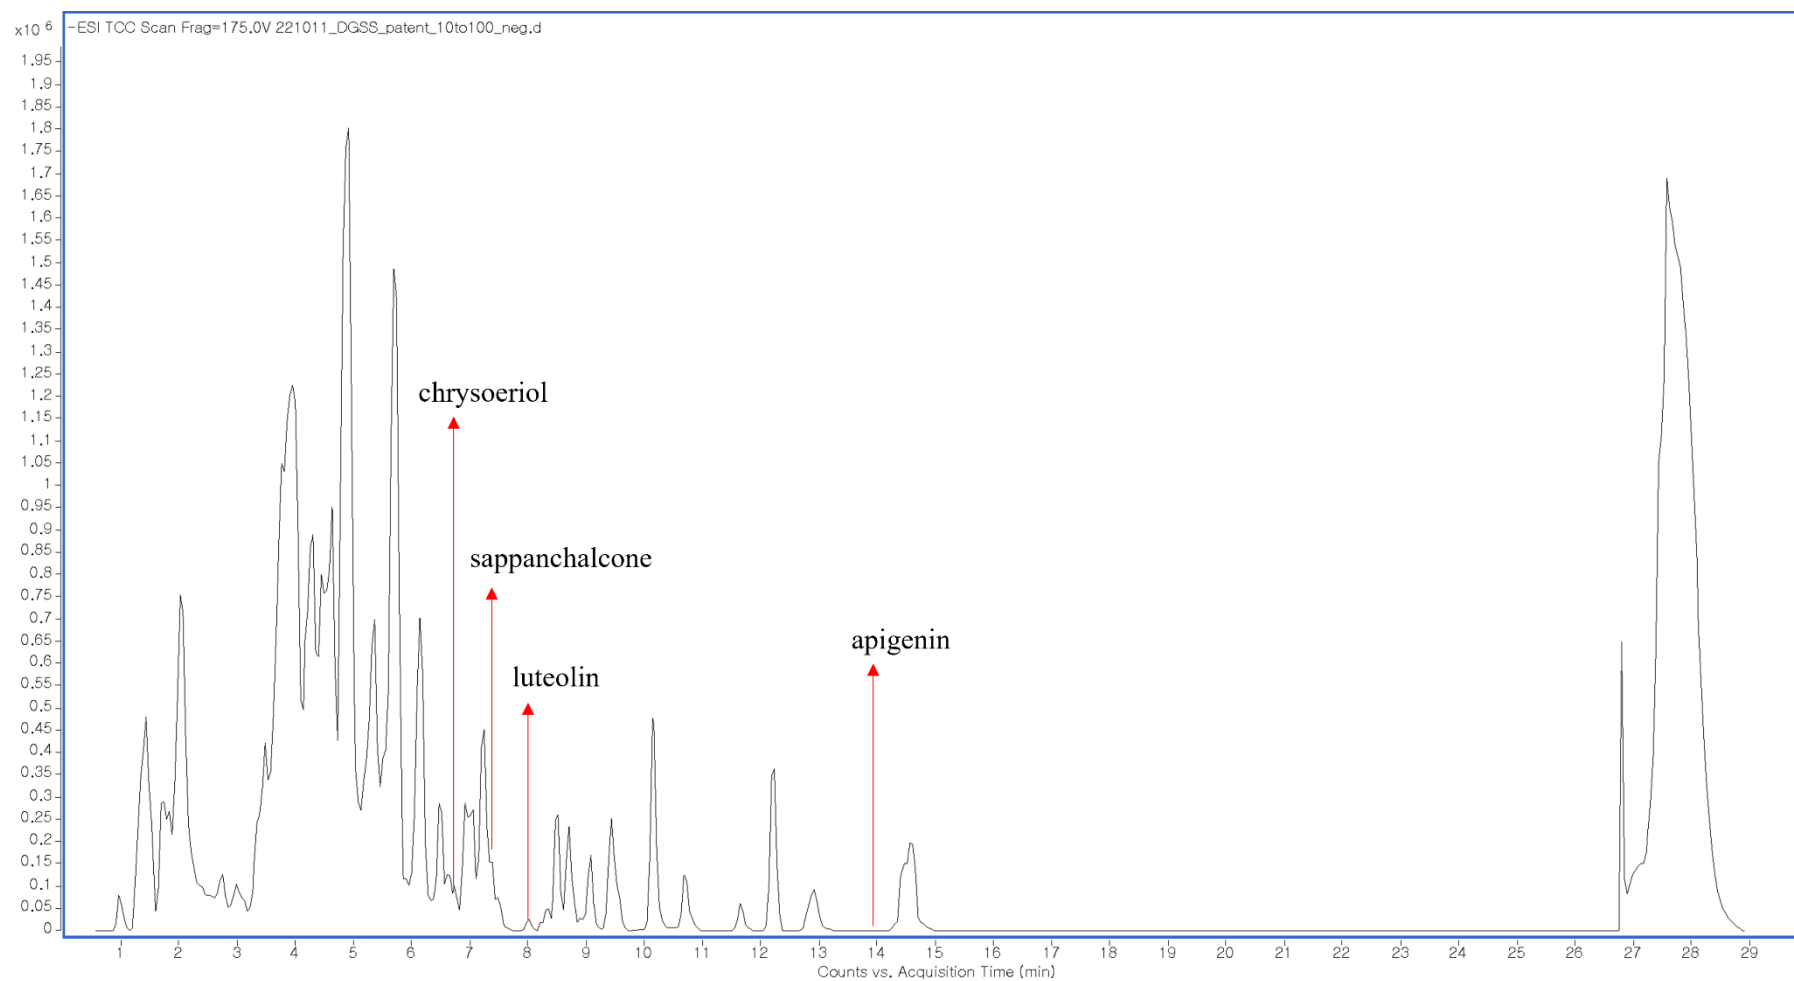

Table S1. List of physicochemical properties, QED and OB of Dangguisu-san derived compounds

| No.                       | Compound Name                 | MW     | ALOGP | HBA | HBD | PSA    | ROTB | AROM | ALERTS | QED   | OB    |
|---------------------------|-------------------------------|--------|-------|-----|-----|--------|------|------|--------|-------|-------|
| <i>Angelica gigas</i>     |                               |        |       |     |     |        |      |      |        |       |       |
| 1                         | nodakenin                     | 408.40 | 0.67  | 9   | 4   | 138.82 | 4    | 2    | 1      | 0.538 | FALSE |
| 2                         | decursin                      | 328.36 | 4.06  | 5   | 0   | 65.74  | 3    | 2    | 2      | 0.628 | TRUE  |
| 3                         | decursinol angelate           | 328.36 | 4.06  | 5   | 0   | 65.74  | 3    | 2    | 2      | 0.628 | TRUE  |
| 4                         | isoimperatorin                | 270.29 | 3.99  | 4   | 0   | 52.58  | 3    | 2    | 2      | 0.625 | TRUE  |
| 5                         | ferulic acid                  | 194.18 | 1.26  | 4   | 2   | 66.76  | 3    | 1    | 1      | 0.711 | TRUE  |
| 6                         | umbelliferone                 | 162.14 | 1.97  | 3   | 1   | 50.44  | 0    | 2    | 1      | 0.602 | TRUE  |
| 7                         | demethylsuberosin             | 230.26 | 3.50  | 3   | 1   | 50.44  | 2    | 2    | 2      | 0.634 | TRUE  |
| 8                         | decursinol                    | 246.26 | 2.81  | 4   | 1   | 59.67  | 0    | 2    | 1      | 0.726 | TRUE  |
| 9                         | xanthoarnol                   | 262.26 | 1.88  | 5   | 2   | 79.90  | 1    | 2    | 1      | 0.767 | TRUE  |
| 10                        | marmesin                      | 246.26 | 2.78  | 4   | 1   | 59.67  | 1    | 2    | 1      | 0.786 | TRUE  |
| 11                        | peucedanone                   | 262.26 | 2.45  | 5   | 2   | 87.74  | 3    | 2    | 1      | 0.829 | TRUE  |
| 12                        | xanthyletin                   | 228.24 | 3.32  | 3   | 0   | 39.44  | 0    | 3    | 1      | 0.554 | TRUE  |
| 13                        | Z-ligustilide                 | 190.24 | 2.99  | 2   | 0   | 26.30  | 2    | 1    | 0      | 0.716 | TRUE  |
| 14                        | Butylidenephthalide           | 188.22 | 3.33  | 2   | 0   | 26.30  | 2    | 1    | 0      | 0.711 | TRUE  |
| <i>Paeonia lactiflora</i> |                               |        |       |     |     |        |      |      |        |       |       |
| 15                        | albiflorin                    | 480.46 | -0.25 | 11  | 5   | 172.21 | 7    | 1    | 1      | 0.326 | FALSE |
| 16                        | oleanolic acid                | 456.7  | 5.85  | 3   | 2   | 57.53  | 1    | 0    | 1      | 0.487 | TRUE  |
| 17                        | paeoniflorin                  | 480.46 | -0.36 | 11  | 5   | 164.37 | 7    | 1    | 0      | 0.346 | FALSE |
| 18                        | paeonol                       | 166.17 | 1.68  | 3   | 1   | 46.53  | 2    | 1    | 0      | 0.727 | TRUE  |
| 19                        | benzoic acid                  | 122.12 | 1.24  | 2   | 1   | 37.30  | 1    | 1    | 0      | 0.608 | TRUE  |
| 20                        | daucosterol                   | 576.85 | 5.02  | 6   | 4   | 99.38  | 9    | 0    | 1      | 0.288 | TRUE  |
| 21                        | betulinic acid                | 456.7  | 5.75  | 3   | 2   | 57.53  | 2    | 0    | 1      | 0.520 | TRUE  |
| 22                        | hederagenin                   | 472.7  | 5.24  | 4   | 3   | 77.76  | 2    | 0    | 1      | 0.480 | TRUE  |
| 23                        | oxypaeoniflorin               | 496.46 | -0.83 | 12  | 6   | 184.60 | 7    | 1    | 0      | 0.276 | FALSE |
| 24                        | 4-O-methylpaeoniflorin        | 494.49 | 0.19  | 11  | 4   | 153.37 | 8    | 1    | 0      | 0.392 | FALSE |
| 25                        | <i>p</i> -hydroxybenzoic acid | 138.12 | 0.74  | 3   | 2   | 57.53  | 1    | 1    | 0      | 0.601 | TRUE  |
| 26                        | 30-norhederagenin             | 456.66 | 5.00  | 4   | 3   | 77.76  | 2    | 0    | 1      | 0.511 | TRUE  |
| 27                        | mudanpioside E                | 526.49 | -0.75 | 13  | 6   | 193.83 | 8    | 1    | 0      | 0.248 | FALSE |
| 28                        | lactiflorin                   | 462.45 | 0.52  | 10  | 3   | 140.98 | 5    | 1    | 0      | 0.567 | FALSE |

|                              |                                                    |        |       |    |   |        |    |   |   |       |       |
|------------------------------|----------------------------------------------------|--------|-------|----|---|--------|----|---|---|-------|-------|
| 29                           | 3,3'-di-O-methylelagic acid                        | 330.25 | 2.71  | 8  | 2 | 119.34 | 2  | 4 | 2 | 0.425 | TRUE  |
| 30                           | mudanpioside C                                     | 600.57 | 0.70  | 13 | 5 | 190.67 | 10 | 2 | 1 | 0.240 | FALSE |
| 31                           | paeonidanin A                                      | 598.59 | 1.86  | 12 | 3 | 167.28 | 11 | 2 | 1 | 0.322 | FALSE |
| 32                           | paeonidanin B                                      | 646.59 | 0.46  | 15 | 6 | 227.97 | 11 | 2 | 2 | 0.144 | FALSE |
| 33                           | paeonidanin C                                      | 614.59 | 1.39  | 13 | 4 | 187.51 | 11 | 2 | 1 | 0.266 | FALSE |
| 34                           | paeoniflorigenone                                  | 318.32 | 1.95  | 6  | 1 | 82.06  | 4  | 1 | 0 | 0.914 | TRUE  |
| 35                           | aromadendrin                                       | 288.25 | 1.15  | 6  | 4 | 107.22 | 1  | 3 | 0 | 0.535 | TRUE  |
| 36                           | $\beta$ -amyrin                                    | 426.72 | 6.92  | 1  | 1 | 20.23  | 0  | 0 | 1 | 0.417 | TRUE  |
| 37                           | arjunolic acid                                     | 488.7  | 4.35  | 5  | 2 | 97.99  | 0  | 0 | 1 | 0.494 | TRUE  |
| 38                           | 24-methylenecycloartanol                           | 440.74 | 7.93  | 1  | 1 | 20.23  | 5  | 0 | 1 | 0.430 | TRUE  |
| 39                           | palbinone                                          | 358.47 | 3.44  | 4  | 2 | 74.60  | 0  | 0 | 1 | 0.651 | TRUE  |
| 40                           | benzoylpaeoniflorin                                | 584.57 | 1.17  | 12 | 4 | 170.44 | 10 | 2 | 1 | 0.295 | FALSE |
| 41                           | 8-debenzoylpaeoniflorin                            | 376.36 | -1.88 | 10 | 6 | 158.30 | 4  | 0 | 0 | 0.328 | FALSE |
| 42                           | paeonilactone A                                    | 198.22 | 1.10  | 4  | 1 | 63.60  | 0  | 0 | 0 | 0.633 | TRUE  |
| 43                           | paeonilactone B                                    | 196.2  | 1.37  | 4  | 1 | 63.60  | 0  | 0 | 0 | 0.635 | TRUE  |
| 44                           | paeonilactone C                                    | 318.32 | 2.04  | 6  | 1 | 89.90  | 4  | 1 | 1 | 0.854 | TRUE  |
| 45                           | pyrethrin I                                        | 328.45 | 5.27  | 3  | 0 | 43.37  | 7  | 0 | 2 | 0.472 | TRUE  |
| 46                           | pyrethrin II                                       | 372.45 | 4.82  | 5  | 0 | 69.67  | 9  | 0 | 3 | 0.330 | TRUE  |
| <i>Lindera strychnifolia</i> |                                                    |        |       |    |   |        |    |   |   |       |       |
| 47                           | linderane                                          | 260.29 | 3.20  | 4  | 0 | 51.97  | 4  | 0 | 2 | 0.575 | TRUE  |
| 48                           | norisoboldine                                      | 313.35 | 3.02  | 5  | 3 | 70.95  | 2  | 2 | 0 | 0.795 | TRUE  |
| 49                           | lindestrene                                        | 214.30 | 4.18  | 1  | 0 | 13.14  | 0  | 0 | 1 | 0.551 | TRUE  |
| 50                           | linderene                                          | 230.30 | 3.25  | 2  | 1 | 33.37  | 0  | 0 | 1 | 0.648 | TRUE  |
| 51                           | chamazulene                                        | 184.28 | 4.78  | 0  | 0 | 0.00   | 1  | 1 | 0 | 0.589 | TRUE  |
| 52                           | linderazulene                                      | 210.27 | 4.89  | 1  | 0 | 13.14  | 0  | 1 | 0 | 0.594 | TRUE  |
| 53                           | linderalactone                                     | 244.29 | 3.34  | 3  | 0 | 39.44  | 0  | 0 | 1 | 0.613 | TRUE  |
| 54                           | isolinderalactone                                  | 244.29 | 3.81  | 3  | 0 | 39.44  | 1  | 0 | 2 | 0.520 | TRUE  |
| 55                           | strychnistenolide                                  | 262.30 | 1.81  | 4  | 2 | 66.76  | 0  | 0 | 1 | 0.653 | TRUE  |
| 56                           | epicatechin                                        | 290.27 | 0.98  | 6  | 5 | 110.38 | 1  | 2 | 1 | 0.501 | TRUE  |
| 57                           | 6,7-dimethoxy-2-(2-phenylethyl)chromone            | 310.34 | 4.80  | 4  | 0 | 48.67  | 5  | 3 | 0 | 0.679 | TRUE  |
| 58                           | 6,7-Dimethoxy-2-(2-(4-methoxyphenyl)ethyl)chromone | 340.37 | 4.86  | 5  | 0 | 57.90  | 6  | 3 | 0 | 0.641 | TRUE  |

|                           |                                |        |      |   |   |        |   |   |   |       |      |
|---------------------------|--------------------------------|--------|------|---|---|--------|---|---|---|-------|------|
| 59                        | norboldine                     | 313.35 | 3.02 | 5 | 3 | 70.95  | 2 | 2 | 0 | 0.795 | TRUE |
| 60                        | nubigenol                      | 290.27 | 1.40 | 6 | 5 | 118.22 | 4 | 2 | 0 | 0.581 | TRUE |
| 61                        | boldine                        | 327.37 | 2.95 | 5 | 2 | 62.16  | 2 | 2 | 0 | 0.888 | TRUE |
| <i>Cyperus rotundus</i>   |                                |        |      |   |   |        |   |   |   |       |      |
| 62                        | cyperene                       | 204.35 | 4.3  | 0 | 0 | 0.00   | 0 | 0 | 1 | 0.516 | TRUE |
| 63                        | $\alpha$ -copaene              | 204.35 | 3.73 | 0 | 0 | 0.00   | 1 | 0 | 1 | 0.571 | TRUE |
| 64                        | $\alpha$ -selinene             | 204.35 | 4.14 | 0 | 0 | 0.00   | 1 | 0 | 1 | 0.563 | TRUE |
| 65                        | rotundene                      | 204.35 | 3.70 | 0 | 0 | 0.00   | 0 | 0 | 1 | 0.528 | TRUE |
| 66                        | valencene                      | 204.35 | 4.14 | 0 | 0 | 0.00   | 1 | 0 | 1 | 0.563 | TRUE |
| 67                        | $\beta$ -gurjunene             | 204.35 | 3.80 | 0 | 0 | 0.00   | 0 | 0 | 1 | 0.526 | TRUE |
| 68                        | trans-calamene                 | 202.34 | 4.48 | 0 | 0 | 0.00   | 1 | 1 | 0 | 0.630 | TRUE |
| 69                        | $\delta$ -cadinene             | 204.35 | 4.01 | 0 | 0 | 0.00   | 1 | 0 | 1 | 0.566 | TRUE |
| 70                        | $\gamma$ -calacorene           | 200.32 | 4.47 | 0 | 0 | 0.00   | 1 | 1 | 0 | 0.627 | TRUE |
| 71                        | epi- $\alpha$ -selinene        | 204.35 | 4.14 | 0 | 0 | 0.00   | 1 | 0 | 1 | 0.563 | TRUE |
| 72                        | $\alpha$ -mauurolene           | 204.35 | 3.73 | 0 | 0 | 0.00   | 1 | 0 | 0 | 0.610 | TRUE |
| 73                        | cadalene                       | 198.3  | 4.97 | 0 | 0 | 0.00   | 1 | 2 | 0 | 0.607 | TRUE |
| 74                        | nootkatene                     | 202.34 | 3.74 | 0 | 0 | 0.00   | 1 | 0 | 1 | 0.568 | TRUE |
| 75                        | cyperotundone                  | 218.33 | 3.97 | 1 | 0 | 17.07  | 0 | 0 | 0 | 0.601 | TRUE |
| 76                        | mustakone                      | 218.33 | 3.40 | 1 | 0 | 17.07  | 1 | 0 | 0 | 0.659 | TRUE |
| 77                        | cyperol                        | 220.35 | 3.62 | 1 | 1 | 20.23  | 1 | 0 | 1 | 0.669 | TRUE |
| 78                        | isocyperol                     | 220.35 | 3.51 | 1 | 1 | 20.23  | 1 | 0 | 0 | 0.717 | TRUE |
| 79                        | $\alpha$ -cyperone             | 218.33 | 4.21 | 1 | 0 | 17.07  | 1 | 0 | 1 | 0.602 | TRUE |
| 80                        | chrysoeriol                    | 300.26 | 2.55 | 6 | 3 | 100.13 | 2 | 3 | 0 | 0.672 | TRUE |
| 81                        | nootkatone                     | 218.33 | 3.82 | 1 | 0 | 17.07  | 1 | 0 | 1 | 0.611 | TRUE |
| <i>Caesalpinia sappan</i> |                                |        |      |   |   |        |   |   |   |       |      |
| 82                        | sappanchalcone                 | 286.28 | 2.53 | 5 | 3 | 86.99  | 4 | 2 | 2 | 0.594 | TRUE |
| 83                        | 3-deoxysappanone B             | 286.28 | 2.42 | 5 | 3 | 86.99  | 2 | 2 | 1 | 0.738 | TRUE |
| 84                        | 3-deoxysappanchalcone          | 270.28 | 3.00 | 4 | 2 | 66.76  | 4 | 2 | 1 | 0.838 | TRUE |
| 85                        | 3'-deoxy-4-O-methylepisappanol | 302.32 | 2.33 | 5 | 3 | 79.15  | 3 | 2 | 0 | 0.811 | TRUE |
| 86                        | brazilin                       | 286.28 | 1.86 | 5 | 4 | 90.15  | 0 | 2 | 1 | 0.555 | TRUE |
| 87                        | brazilein                      | 284.26 | 1.68 | 5 | 3 | 86.99  | 0 | 1 | 1 | 0.631 | TRUE |

|                               |                     |        |       |    |    |        |   |   |   |       |       |
|-------------------------------|---------------------|--------|-------|----|----|--------|---|---|---|-------|-------|
| 88                            | brazilane           | 270.28 | 2.37  | 4  | 3  | 69.92  | 0 | 2 | 1 | 0.643 | TRUE  |
| 89                            | hematoxyline        | 302.28 | 1.37  | 6  | 5  | 110.38 | 0 | 2 | 1 | 0.470 | TRUE  |
| 90                            | hematein            | 300.26 | 1.17  | 6  | 4  | 107.22 | 0 | 1 | 1 | 0.536 | TRUE  |
| <i>Catharmus tinctorius</i>   |                     |        |       |    |    |        |   |   |   |       |       |
| 91                            | 6-hydroxykaempferol | 302.24 | 1.54  | 7  | 5  | 131.36 | 1 | 3 | 1 | 0.431 | TRUE  |
| 92                            | carthamone          | 448.38 | -0.53 | 11 | 6  | 191.05 | 6 | 1 | 3 | 0.186 | FALSE |
| 93                            | quercetagetin       | 318.24 | 1.06  | 8  | 6  | 151.59 | 1 | 3 | 1 | 0.364 | FALSE |
| 94                            | kaempferol          | 286.24 | 2.03  | 6  | 4  | 111.13 | 1 | 3 | 0 | 0.544 | TRUE  |
| 95                            | luteolin            | 286.24 | 2.03  | 6  | 4  | 111.13 | 1 | 3 | 1 | 0.509 | TRUE  |
| 96                            | quercetin           | 302.24 | 1.54  | 7  | 5  | 131.36 | 1 | 3 | 1 | 0.431 | TRUE  |
| 97                            | apigenin            | 270.24 | 2.52  | 5  | 3  | 90.90  | 1 | 3 | 0 | 0.632 | TRUE  |
| 98                            | safflomin A         | 612.53 | -3.25 | 16 | 12 | 295.36 | 6 | 1 | 3 | 0.085 | FALSE |
| 99                            | sophoricoside       | 432.38 | 0.35  | 10 | 6  | 170.05 | 4 | 3 | 0 | 0.338 | FALSE |
| <i>Prunus persica</i>         |                     |        |       |    |    |        |   |   |   |       |       |
| 100                           | amygdalin           | 457.43 | -2.71 | 12 | 7  | 202.32 | 7 | 1 | 0 | 0.223 | FALSE |
| 101                           | prunasin            | 295.29 | -0.66 | 7  | 4  | 123.17 | 4 | 1 | 0 | 0.581 | TRUE  |
| 102                           | neoamygdalin        | 457.43 | -2.71 | 12 | 7  | 202.32 | 7 | 1 | 0 | 0.223 | FALSE |
| 103                           | vanilloside         | 316.30 | -0.80 | 8  | 5  | 128.84 | 5 | 1 | 0 | 0.477 | FALSE |
| 104                           | lacticolorin        | 406.38 | 0.22  | 9  | 5  | 145.91 | 7 | 2 | 0 | 0.436 | FALSE |
| <i>Cinnamomum cassia</i>      |                     |        |       |    |    |        |   |   |   |       |       |
| 105                           | cinnamic acid       | 148.16 | 1.70  | 2  | 1  | 37.30  | 2 | 1 | 1 | 0.648 | TRUE  |
| 106                           | cinnamaldehyde      | 132.16 | 2.48  | 1  | 0  | 17.07  | 2 | 1 | 2 | 0.446 | TRUE  |
| 107                           | coumarin            | 146.14 | 2.50  | 2  | 0  | 30.21  | 0 | 1 | 1 | 0.526 | TRUE  |
| <i>Glycyrrhiza uralenesis</i> |                     |        |       |    |    |        |   |   |   |       |       |
| 108                           | glycyrrhizin        | 822.93 | 0.52  | 16 | 8  | 267.04 | 7 | 0 | 1 | 0.163 | FALSE |
| 109                           | liquiritin          | 418.39 | 0.36  | 9  | 5  | 145.91 | 4 | 2 | 0 | 0.475 | FALSE |
| 110                           | liquiritigenin      | 256.25 | 2.55  | 4  | 2  | 66.76  | 1 | 2 | 0 | 0.822 | TRUE  |
| 111                           | isoliquiritin       | 418.39 | 0.42  | 9  | 6  | 156.91 | 6 | 2 | 1 | 0.366 | FALSE |
| 112                           | isoliquiritigenin   | 256.25 | 2.48  | 4  | 3  | 77.76  | 3 | 2 | 1 | 0.737 | TRUE  |
| 113                           | formonetin          | 284.26 | 3.03  | 5  | 2  | 79.9   | 2 | 3 | 1 | 0.707 | TRUE  |
| 114                           | ononin              | 430.40 | 1.36  | 9  | 4  | 138.82 | 5 | 3 | 0 | 0.472 | FALSE |
| 115                           | glycycoumarin       | 368.38 | 4.28  | 6  | 3  | 100.13 | 4 | 2 | 2 | 0.550 | TRUE  |

|     |                   |        |      |   |   |       |   |   |   |       |      |
|-----|-------------------|--------|------|---|---|-------|---|---|---|-------|------|
| 116 | glycyrol          | 366.36 | 4.62 | 6 | 2 | 93.04 | 3 | 2 | 2 | 0.608 | TRUE |
| 117 | prunetin          | 284.26 | 3.03 | 5 | 2 | 79.9  | 2 | 3 | 0 | 0.756 | TRUE |
| 118 | glycyrrhetic acid | 470.68 | 5.55 | 4 | 2 | 74.6  | 1 | 0 | 0 | 0.527 | TRUE |
| 119 | licoricidin       | 424.53 | 5.93 | 5 | 3 | 79.15 | 6 | 2 | 1 | 0.501 | TRUE |

Table S2. List of expected active compounds

| No.                       | Compound Name                        | MW     | ALOGP | HBA | HBD | PSA    | ROTB | AROM | ALERTS | QED   | OB   |
|---------------------------|--------------------------------------|--------|-------|-----|-----|--------|------|------|--------|-------|------|
| <i>Angelica gigas</i>     |                                      |        |       |     |     |        |      |      |        |       |      |
| 1                         | decursin                             | 328.36 | 4.06  | 5   | 0   | 65.74  | 3    | 2    | 2      | 0.628 | TRUE |
| 2                         | decursinol angelate                  | 328.36 | 4.06  | 5   | 0   | 65.74  | 3    | 2    | 2      | 0.628 | TRUE |
| 3                         | isoimperatorin                       | 270.29 | 3.99  | 4   | 0   | 52.58  | 3    | 2    | 2      | 0.625 | TRUE |
| 4                         | ferulic acid                         | 194.18 | 1.26  | 4   | 2   | 66.76  | 3    | 1    | 1      | 0.711 | TRUE |
| 5                         | umbelliferone                        | 162.14 | 1.97  | 3   | 1   | 50.44  | 0    | 2    | 1      | 0.602 | TRUE |
| 6                         | demethylsuberosin                    | 230.26 | 3.50  | 3   | 1   | 50.44  | 2    | 2    | 2      | 0.634 | TRUE |
| 7                         | decursinol                           | 246.26 | 2.81  | 4   | 1   | 59.67  | 0    | 2    | 1      | 0.726 | TRUE |
| 8                         | xanthoarnol                          | 262.26 | 1.88  | 5   | 2   | 79.90  | 1    | 2    | 1      | 0.767 | TRUE |
| 9                         | marmesin                             | 246.26 | 2.78  | 4   | 1   | 59.67  | 1    | 2    | 1      | 0.786 | TRUE |
| 10                        | peucedanone                          | 262.26 | 2.45  | 5   | 2   | 87.74  | 3    | 2    | 1      | 0.829 | TRUE |
| 11                        | xanthyletin                          | 228.24 | 3.32  | 3   | 0   | 39.44  | 0    | 3    | 1      | 0.554 | TRUE |
| 12                        | Z-ligustilide                        | 190.24 | 2.99  | 2   | 0   | 26.30  | 2    | 1    | 0      | 0.716 | TRUE |
| 13                        | Butylidenephthalide                  | 188.22 | 3.33  | 2   | 0   | 26.30  | 2    | 1    | 0      | 0.711 | TRUE |
| <i>Paeonia lactiflora</i> |                                      |        |       |     |     |        |      |      |        |       |      |
| 14                        | oleanolic acid                       | 456.7  | 5.85  | 3   | 2   | 57.53  | 1    | 0    | 1      | 0.487 | TRUE |
| 15                        | paeonol                              | 166.17 | 1.68  | 3   | 1   | 46.53  | 2    | 1    | 0      | 0.727 | TRUE |
| 16                        | benzoic acid                         | 122.12 | 1.24  | 2   | 1   | 37.30  | 1    | 1    | 0      | 0.608 | TRUE |
| 17                        | daucosterol                          | 576.85 | 5.02  | 6   | 4   | 99.38  | 9    | 0    | 1      | 0.288 | TRUE |
| 18                        | betulinic acid                       | 456.7  | 5.75  | 3   | 2   | 57.53  | 2    | 0    | 1      | 0.520 | TRUE |
| 19                        | hederagenin                          | 472.7  | 5.24  | 4   | 3   | 77.76  | 2    | 0    | 1      | 0.480 | TRUE |
| 20                        | <i>p</i> -hydroxybenzoic acid        | 138.12 | 0.74  | 3   | 2   | 57.53  | 1    | 1    | 0      | 0.601 | TRUE |
| 21                        | 30-norhederagenin                    | 456.66 | 5.00  | 4   | 3   | 77.76  | 2    | 0    | 1      | 0.511 | TRUE |
| 22                        | 3,3'-di- <i>O</i> -methylelagic acid | 330.25 | 2.71  | 8   | 2   | 119.34 | 2    | 4    | 2      | 0.425 | TRUE |
| 23                        | paeoniflorigenone                    | 318.32 | 1.95  | 6   | 1   | 82.06  | 4    | 1    | 0      | 0.914 | TRUE |
| 24                        | aromadendrin                         | 288.25 | 1.15  | 6   | 4   | 107.22 | 1    | 3    | 0      | 0.535 | TRUE |
| 25                        | $\beta$ -amyrin                      | 426.72 | 6.92  | 1   | 1   | 20.23  | 0    | 0    | 1      | 0.417 | TRUE |
| 26                        | arjunolic acid                       | 488.7  | 4.35  | 5   | 2   | 97.99  | 0    | 0    | 1      | 0.494 | TRUE |
| 27                        | 24-methylenecycloartanol             | 440.74 | 7.93  | 1   | 1   | 20.23  | 5    | 0    | 1      | 0.430 | TRUE |



|                              |                                                    |        |      |   |   |        |   |   |   |       |      |
|------------------------------|----------------------------------------------------|--------|------|---|---|--------|---|---|---|-------|------|
| 28                           | palbinone                                          | 358.47 | 3.44 | 4 | 2 | 74.60  | 0 | 0 | 1 | 0.651 | TRUE |
| 29                           | paeonilactone A                                    | 198.22 | 1.10 | 4 | 1 | 63.60  | 0 | 0 | 0 | 0.633 | TRUE |
| 30                           | paeonilactone B                                    | 196.2  | 1.37 | 4 | 1 | 63.60  | 0 | 0 | 0 | 0.635 | TRUE |
| 31                           | paeonilactone C                                    | 318.32 | 2.04 | 6 | 1 | 89.90  | 4 | 1 | 1 | 0.854 | TRUE |
| 32                           | pyrethrin I                                        | 328.45 | 5.27 | 3 | 0 | 43.37  | 7 | 0 | 2 | 0.472 | TRUE |
| 33                           | pyrethrin II                                       | 372.45 | 4.82 | 5 | 0 | 69.67  | 9 | 0 | 3 | 0.330 | TRUE |
| <i>Lindera strychnifolin</i> |                                                    |        |      |   |   |        |   |   |   |       |      |
| 34                           | linderane                                          | 260.29 | 3.20 | 4 | 0 | 51.97  | 4 | 0 | 2 | 0.575 | TRUE |
| 35                           | norisoboldine                                      | 313.35 | 3.02 | 5 | 3 | 70.95  | 2 | 2 | 0 | 0.795 | TRUE |
| 36                           | lindestrene                                        | 214.30 | 4.18 | 1 | 0 | 13.14  | 0 | 0 | 1 | 0.551 | TRUE |
| 37                           | linderene                                          | 230.30 | 3.25 | 2 | 1 | 33.37  | 0 | 0 | 1 | 0.648 | TRUE |
| 38                           | chamazulene                                        | 184.28 | 4.78 | 0 | 0 | 0.00   | 1 | 1 | 0 | 0.589 | TRUE |
| 39                           | linderazulene                                      | 210.27 | 4.89 | 1 | 0 | 13.14  | 0 | 1 | 0 | 0.594 | TRUE |
| 40                           | linderalactone                                     | 244.29 | 3.34 | 3 | 0 | 39.44  | 0 | 0 | 1 | 0.613 | TRUE |
| 41                           | isolinderalactone                                  | 244.29 | 3.81 | 3 | 0 | 39.44  | 1 | 0 | 2 | 0.520 | TRUE |
| 42                           | strychnistenolide                                  | 262.30 | 1.81 | 4 | 2 | 66.76  | 0 | 0 | 1 | 0.653 | TRUE |
| 43                           | epicatechin                                        | 290.27 | 0.98 | 6 | 5 | 110.38 | 1 | 2 | 1 | 0.501 | TRUE |
| 44                           | 6,7-dimethoxy-2-(2-phenylethyl)chromone            | 310.34 | 4.80 | 4 | 0 | 48.67  | 5 | 3 | 0 | 0.679 | TRUE |
| 45                           | 6,7-Dimethoxy-2-(2-(4-methoxyphenyl)ethyl)chromone | 340.37 | 4.86 | 5 | 0 | 57.90  | 6 | 3 | 0 | 0.641 | TRUE |
| 46                           | norboldine                                         | 313.35 | 3.02 | 5 | 3 | 70.95  | 2 | 2 | 0 | 0.795 | TRUE |
| 47                           | nubigenol                                          | 290.27 | 1.40 | 6 | 5 | 118.22 | 4 | 2 | 0 | 0.581 | TRUE |
| 48                           | boldine                                            | 327.37 | 2.95 | 5 | 2 | 62.16  | 2 | 2 | 0 | 0.888 | TRUE |
| <i>Cyperus rotundus</i>      |                                                    |        |      |   |   |        |   |   |   |       |      |
| 49                           | cyperene                                           | 204.35 | 4.3  | 0 | 0 | 0.00   | 0 | 0 | 1 | 0.516 | TRUE |
| 50                           | $\alpha$ -copaene                                  | 204.35 | 3.73 | 0 | 0 | 0.00   | 1 | 0 | 1 | 0.571 | TRUE |
| 51                           | $\alpha$ -selinene                                 | 204.35 | 4.14 | 0 | 0 | 0.00   | 1 | 0 | 1 | 0.563 | TRUE |
| 52                           | rotundene                                          | 204.35 | 3.70 | 0 | 0 | 0.00   | 0 | 0 | 1 | 0.528 | TRUE |
| 53                           | valencene                                          | 204.35 | 4.14 | 0 | 0 | 0.00   | 1 | 0 | 1 | 0.563 | TRUE |
| 54                           | $\beta$ -gurjunene                                 | 204.35 | 3.80 | 0 | 0 | 0.00   | 0 | 0 | 1 | 0.526 | TRUE |
| 55                           | trans-calamene                                     | 202.34 | 4.48 | 0 | 0 | 0.00   | 1 | 1 | 0 | 0.630 | TRUE |
| 56                           | $\delta$ -cadinene                                 | 204.35 | 4.01 | 0 | 0 | 0.00   | 1 | 0 | 1 | 0.566 | TRUE |

[illegible]

|    |                |        |      |   |   |       |   |   |   |       |      |
|----|----------------|--------|------|---|---|-------|---|---|---|-------|------|
| 84 | cinnamic acid  | 148.16 | 1.70 | 2 | 1 | 37.30 | 2 | 1 | 1 | 0.648 | TRUE |
| 85 | cinnamaldehyde | 132.16 | 2.48 | 1 | 0 | 17.07 | 2 | 1 | 2 | 0.446 | TRUE |
| 86 | coumarin       | 146.14 | 2.50 | 2 | 0 | 30.21 | 0 | 1 | 1 | 0.526 | TRUE |

*Glycyrrhiza uralensis*

|    |                   |        |      |   |   |        |   |   |   |       |      |
|----|-------------------|--------|------|---|---|--------|---|---|---|-------|------|
| 87 | liquiritigenin    | 256.25 | 2.55 | 4 | 2 | 66.76  | 1 | 2 | 0 | 0.822 | TRUE |
| 88 | isoliquiritigenin | 256.25 | 2.48 | 4 | 3 | 77.76  | 3 | 2 | 1 | 0.737 | TRUE |
| 89 | formonetin        | 284.26 | 3.03 | 5 | 2 | 79.9   | 2 | 3 | 1 | 0.707 | TRUE |
| 90 | glycy coumarin    | 368.38 | 4.28 | 6 | 3 | 100.13 | 4 | 2 | 2 | 0.550 | TRUE |
| 91 | glycyrol          | 366.36 | 4.62 | 6 | 2 | 93.04  | 3 | 2 | 2 | 0.608 | TRUE |
| 92 | prunetin          | 284.26 | 3.03 | 5 | 2 | 79.9   | 2 | 3 | 0 | 0.756 | TRUE |
| 93 | glycyrrhetic acid | 470.68 | 5.55 | 4 | 2 | 74.6   | 1 | 0 | 0 | 0.527 | TRUE |
| 94 | licoricidin       | 424.53 | 5.93 | 5 | 3 | 79.15  | 6 | 2 | 1 | 0.501 | TRUE |

Table S3. List of potential targets

| No. | Uniprot ID | Gene     | Relevance score | Protein class              |
|-----|------------|----------|-----------------|----------------------------|
| 1   | P00734     | F2       | 58.855          | Enzyme                     |
| 2   | O60674     | JAK2     | 36.781          | Kinase                     |
| 3   | P13726     | F3       | 23.179          | Receptor                   |
| 4   | P05121     | SERPINE1 | 21.828          | Enzyme modulator           |
| 5   | P00742     | F10      | 15.713          | Enzyme                     |
| 6   | P00747     | PLG      | 12.016          | Enzyme                     |
| 7   | P31749     | AKT1     | 11.390          | Kinase                     |
| 8   | P42336     | PIK3CA   | 9.507           | Kinase                     |
| 9   | P11712     | CYP2C9   | 8.860           | -                          |
| 10  | P05231     | IL6      | 8.536           | -                          |
| 11  | P37023     | ACVRL1   | 8.031           | Kinase                     |
| 12  | P29474     | NOS3     | 7.956           | -                          |
| 13  | P15692     | VEGFA    | 7.895           | Signaling                  |
| 14  | P16581     | SELE     | 7.715           | -                          |
| 15  | P01911     | HLA-DRB1 | 7.697           | Immune response            |
| 16  | O00206     | TLR4     | 7.630           | -                          |
| 17  | P02768     | ALB      | 7.226           | Transporter                |
| 18  | P01375     | TNF      | 7.125           | Signaling                  |
| 19  | Q13315     | ATM      | 6.941           | Kinase                     |
| 20  | P12821     | ACE      | 6.867           | Enzyme                     |
| 21  | P35354     | PTGS2    | 6.734           | Enzyme                     |
| 22  | O75874     | IDH1     | 6.726           | -                          |
| 23  | P33261     | CYP2C19  | 6.485           | -                          |
| 24  | Q9Y2R2     | PTPN22   | 6.229           | -                          |
| 25  | P16234     | PDGFRA   | 5.720           | Kinase                     |
| 26  | Q13093     | PLA2G7   | 5.527           | Enzyme                     |
| 27  | P23219     | PTGS1    | 5.516           | Enzyme                     |
| 28  | O14746     | TERT     | 5.463           | Enzyme                     |
| 29  | P05362     | ICAM1    | 5.260           | -                          |
| 30  | P13569     | CFTR     | 5.085           | Ion channel                |
| 31  | Q08499     | PDE4D    | 4.963           | -                          |
| 32  | Q99895     | CTRC     | 4.855           | -                          |
| 33  | P15085     | CPA1     | 4.744           | Enzyme                     |
| 34  | P07477     | PRSS1    | 4.744           | Enzyme                     |
| 35  | P19438     | TNFRSF1A | 4.729           | -                          |
| 36  | P00749     | PLAU     | 4.719           | Enzyme                     |
| 37  | P19320     | VCAM1    | 4.597           | -                          |
| 38  | P27169     | PON1     | 4.476           | -                          |
| 39  | P08581     | MET      | 4.397           | Kinase                     |
| 40  | P32246     | CCR1     | 4.339           | G-protein coupled receptor |
| 41  | P01042     | KNG1     | 4.289           | Enzyme modulator           |
| 42  | P34949     | MPI      | 4.280           | Enzyme                     |
| 43  | P05164     | MPO      | 4.240           | Enzyme                     |
| 44  | P35222     | CTNNB1   | 4.002           | -                          |
| 45  | P08183     | ABCB1    | 3.940           | Transporter                |
| 46  | P14780     | MMP9     | 3.936           | Enzyme                     |
| 47  | P40763     | STAT3    | 3.767           | Nucleic acid binding       |

|    |        |        |       |                            |
|----|--------|--------|-------|----------------------------|
| 48 | P31645 | SLC6A4 | 3.663 | Transporter                |
| 49 | P11509 | CYP2A6 | 3.460 | -                          |
| 50 | P08254 | MMP3   | 3.432 | Enzyme                     |
| 51 | P03372 | ESR1   | 3.424 | Nuclear receptor           |
| 52 | P09038 | FGF2   | 3.380 | Signaling                  |
| 53 | P48736 | PIK3CG | 3.213 | Kinase                     |
| 54 | P08253 | MMP2   | 3.102 | Enzyme                     |
| 55 | P08684 | CYP3A4 | 3.073 | Enzyme                     |
| 56 | P04278 | SHBG   | 3.028 | -                          |
| 57 | P60568 | IL2    | 2.973 | -                          |
| 58 | P52732 | KIF11  | 2.861 | Cellular structure         |
| 59 | Q16665 | HIF1A  | 2.834 | Transcription factor       |
| 60 | P12931 | SRC    | 2.834 | Kinase                     |
| 61 | P05107 | ITGB2  | 2.812 | Receptor                   |
| 62 | P61073 | CXCR4  | 2.595 | G-protein coupled receptor |
| 63 | Q07817 | BCL2L1 | 2.575 | Signaling                  |
| 64 | P03956 | MMP1   | 2.561 | Enzyme                     |
| 65 | P45379 | TNNT2  | 2.557 | Cellular structure         |
| 66 | Q9NR96 | TLR9   | 2.523 | -                          |
| 67 | P37231 | PPARG  | 2.515 | Nuclear receptor           |
| 68 | P23526 | AHCY   | 2.489 | Enzyme                     |
| 69 | Q06124 | PTPN11 | 2.467 | -                          |
| 70 | P08246 | ELANE  | 2.460 | Enzyme                     |
| 71 | P19429 | TNNI3  | 2.443 | Cellular structure         |
| 72 | P10721 | KIT    | 2.435 | Kinase                     |
| 73 | P04035 | HMGCR  | 2.400 | -                          |
| 74 | Q14790 | CASP8  | 2.362 | Enzyme                     |
| 75 | P11597 | CETP   | 2.356 | -                          |
| 76 | P00519 | ABL1   | 2.346 | Kinase                     |
| 77 | P21964 | COMT   | 2.320 | Enzyme                     |
| 78 | P20701 | ITGAL  | 2.274 | -                          |
| 79 | P05067 | APP    | 2.270 | Enzyme modulator           |
| 80 | Q15910 | EZH2   | 2.228 | Epigenetic regulator       |
| 81 | P04818 | TYMS   | 2.218 | Enzyme                     |
| 82 | P42345 | MTOR   | 2.209 | Kinase                     |
| 83 | Q9Y243 | AKT3   | 2.209 | Kinase                     |
| 84 | P02766 | TTR    | 2.190 | Transporter                |
| 85 | P14174 | MIF    | 2.184 | -                          |
| 86 | P35968 | KDR    | 2.177 | Kinase                     |
| 87 | Q9GZT9 | EGLN1  | 2.160 | -                          |
| 88 | P51451 | BLK    | 2.154 | Kinase                     |
| 89 | P09619 | PDGFRB | 2.117 | Kinase                     |
| 90 | P43405 | SYK    | 2.066 | Kinase                     |
| 91 | P19838 | NFKB1  | 2.011 | Transcription factor       |
| 92 | Q99835 | SMO    | 1.998 | G-protein coupled receptor |
| 93 | Q14524 | SCN5A  | 1.956 | Ion channel                |
| 94 | P00533 | EGFR   | 1.950 | Kinase                     |
| 95 | P01130 | LDLR   | 1.928 | -                          |
| 96 | P28223 | HTR2A  | 1.883 | G-protein coupled receptor |
